# Supplementary material for: Sulfoxaflor exposure reduces egg laying in bumblebees Bombus terrestris
Source: PubMed Central journal article supplement (PMC7004077; doi:10.1111/1365-2664.13519), 2019-10-29
Supplement: JPE-57-160-s002.pdf [file JPE-57-160-s002.pdf]

| Table S1: Table of candiate models used for each analysis. Bold indicates that the model was selected within the anlysis (wi ≥ 0.0 5) |             |              |               |
|---------------------------------------------------------------------------------------------------------------------------------------|-------------|--------------|---------------|
| <b>A) Latency to lay eggs: Mixed effect cox model (coxme). Colony of origin and microcolony included as random factors</b>            |             |              |               |
|                                                                                                                                       | <b>AICc</b> | <b>ΔAICc</b> | <b>wi</b>     |
| null model                                                                                                                            | 509.10      | 0.00         | 1.00          |
| treatment                                                                                                                             | 601.60      | 92.50        | 0.00          |
| <b>B) Sucrose drank per bee (lmer): Colony of origin and microcolony included as random factors</b>                                   |             |              |               |
|                                                                                                                                       | <b>AICc</b> | <b>ΔAICc</b> | <b>wi</b>     |
| treatment + day                                                                                                                       | -1303.90    | 0.00         | 1.00          |
| treatment + day + treatment:day                                                                                                       | -1279.50    | 24.40        | 0.00          |
| day                                                                                                                                   | -1275.50    | 28.33        | 0.00          |
| treatment                                                                                                                             | -1250.70    | 53.16        | 0.00          |
| null model                                                                                                                            | -1221.80    | 82.11        | 0.00          |
| <b>C) Egg production (glimmTMB hurdle model): Colony of origin included as a random factor</b>                                        |             |              |               |
|                                                                                                                                       | <b>AICc</b> | <b>ΔAICc</b> | <b>wi</b>     |
| treatment                                                                                                                             | 849.20      | 0.00         | 1.00          |
| null model                                                                                                                            | 871.90      | 22.67        | 0.00          |
| <b>D) Larvae production (glimmTMB hurdle model): Colony of origin included as a random factor</b>                                     |             |              |               |
|                                                                                                                                       | <b>AICc</b> | <b>ΔAICc</b> | <b>wi</b>     |
| treatment                                                                                                                             | 439.90      | 0.00         | 0.94          |
| null model                                                                                                                            | 445.50      | 5.56         | 0.06          |
| <b>E) Ovary development (glmer, binomial distribution): Colony of origin and microcolony included as random factors</b>               |             |              |               |
|                                                                                                                                       | <b>AICc</b> | <b>ΔAICc</b> | <b>wi</b>     |
| treatment + bee size                                                                                                                  | 323.20      | 0.00         | 1.00          |
| treatment                                                                                                                             | 362.60      | 39.38        | 0.00          |
| bee size                                                                                                                              | 405.70      | 82.50        | 0.00          |
| null model                                                                                                                            | 436.50      | 113.32       | 0.00          |
| <b>F) Mean oocyte size per bee (lmer): Colony of origin and microcolony included as random factors</b>                                |             |              |               |
|                                                                                                                                       | <b>AICc</b> | <b>ΔAICc</b> | <b>wi</b>     |
| treatment + bee size                                                                                                                  | 397.10      | 0.00         | 0.85          |
| treatment + bee size + treatment:bee size                                                                                             | 400.50      | 3.42         | 0.15          |
| treatment                                                                                                                             | 414.70      | 17.55        | 0.00          |
| bee size                                                                                                                              | 443.20      | 46.11        | 0.00          |
| null model                                                                                                                            | 462.10      | 65.01        | 0.00          |
| <b>G) Maximum oocyte size per bee (lmer) : Colony of origin and microcolony included as random factors</b>                            |             |              |               |
|                                                                                                                                       | <b>AICc</b> | <b>ΔAICc</b> | <b>wi</b>     |
| treatment + bee size                                                                                                                  | 443.30      | 0.00         | 0.89          |
| treatment + bee size + treatment:bee size                                                                                             | 447.80      | 4.52         | 0.09          |
| treatment                                                                                                                             | 451.50      | 8.20         | 0.02          |
| bee size                                                                                                                              | 461.70      | 18.41        | 0.00          |
| null model                                                                                                                            | 470.20      | 26.93        | 0.00          |
| <b>H) Worker survival (coxme) : Colony of origin and microcolony included as random factors</b>                                       |             |              |               |
|                                                                                                                                       | <b>AICc</b> | <b>delta</b> | <b>weight</b> |
| treatment                                                                                                                             | 1034.30     | 0.00         | 1.00          |
| null model                                                                                                                            | 1110.70     | 76.39        | 0.00          |
