# Supplementary material for: Sulfoxaflor exposure reduces egg laying in bumblebees Bombus terrestris
Source: PubMed Central journal article supplement (PMC7004077; doi:10.1111/1365-2664.13519), 2019-10-29
Supplement: JPE-57-160-s003.pdf [file JPE-57-160-s003.pdf]

Table S2. Parameter estimates and 95% confidence intervals derived by model averaging across the confidence set of models. Parameters highlighted in bold have 95% confidence intervals that do not cross zero. Results correct to 2 decimal places.

|                                       | Estimate     | Std. Error  | Lower CI     | Upper CI     |
|---------------------------------------|--------------|-------------|--------------|--------------|
| <b>A) Latency to lay eggs</b>         |              |             |              |              |
| 5ppb                                  | -0.41        | 0.31        | -1.02        | 0.19         |
| 10ppb                                 | -0.45        | 0.30        | -1.04        | 0.14         |
| <b>250ppb</b>                         | <b>-4.40</b> | <b>1.03</b> | <b>-6.42</b> | <b>-2.38</b> |
| <b>B) Sucrose drank per bee</b>       |              |             |              |              |
| (Intercept)                           | 0.49         | 0.04        | 0.41         | 0.57         |
| <b>5ppb</b>                           | <b>-0.09</b> | <b>0.04</b> | <b>-0.17</b> | <b>-0.02</b> |
| 10ppb                                 | -0.06        | 0.04        | -0.13        | 0.02         |
| <b>250ppb</b>                         | <b>-0.23</b> | <b>0.04</b> | <b>-0.31</b> | <b>-0.16</b> |
| day                                   | <b>0.01</b>  | <b>0.00</b> | <b>0.01</b>  | <b>0.02</b>  |
| <b>C) Egg production</b>              |              |             |              |              |
| (Intercept)                           | 2.92         | 0.06        | 2.80         | 3.04         |
| <b>5ppb (count)</b>                   | <b>-0.16</b> | <b>0.08</b> | <b>-0.31</b> | <b>-0.01</b> |
| 10ppb (count)                         | -0.10        | 0.07        | -0.24        | 0.04         |
| <b>250ppb (count)</b>                 | <b>-1.30</b> | <b>0.31</b> | <b>-1.91</b> | <b>-0.70</b> |
| (Intercept zero)                      | -1.53        | 0.77        | -3.03        | -0.03        |
| 5ppb (zero)                           | 0.89         | 0.69        | -0.45        | 2.24         |
| 10ppb(zero)                           | 0.48         | 0.70        | -0.89        | 1.84         |
| <b>250ppb (zero)</b>                  | <b>4.88</b>  | <b>1.05</b> | <b>2.82</b>  | <b>6.93</b>  |
| <b>D) Larvae production</b>           |              |             |              |              |
| (Intercept count)                     | 2.00         | 0.16        | 1.68         | 2.31         |
| 5ppb (count)                          | 0.04         | 0.13        | -0.22        | 0.30         |
| <b>10ppb(count)</b>                   | <b>-0.38</b> | <b>0.17</b> | <b>-0.69</b> | <b>-0.12</b> |
| (Intercept zero)                      | -0.69        | 0.39        | -1.46        | 0.08         |
| <b>5ppb (zero)</b>                    | <b>1.24</b>  | <b>0.54</b> | <b>0.16</b>  | <b>2.32</b>  |
| 10ppb(zero)                           | 0.96         | 0.53        | -0.10        | 2.02         |
| <b>E) Ovary development</b>           |              |             |              |              |
| (Intercept)                           | -11.88       | 2.34        | -16.47       | -7.28        |
| 5ppb                                  | 0.15         | 0.44        | -0.72        | 1.02         |
| 10ppb                                 | -0.42        | 0.43        | -1.25        | 0.42         |
| <b>250ppb</b>                         | <b>-4.74</b> | <b>0.71</b> | <b>-6.14</b> | <b>-3.34</b> |
| bee size                              | <b>2.61</b>  | <b>0.46</b> | <b>1.72</b>  | <b>3.51</b>  |
| <b>F) Mean oocyte size per bee</b>    |              |             |              |              |
| (Intercept)                           | 0.31         | 0.59        | -0.85        | 1.47         |
| 5ppb                                  | -0.73        | 0.55        | -1.81        | 0.36         |
| 10ppb                                 | -0.42        | 0.67        | -1.73        | 0.89         |
| <b>bee size</b>                       | <b>0.46</b>  | <b>0.11</b> | <b>0.24</b>  | <b>0.67</b>  |
| bee size:5ppb                         | 0.02         | 0.10        | -0.18        | 0.23         |
| bee size:10ppb                        | -0.04        | 0.13        | -0.28        | 0.21         |
| <b>G) Maximum oocyte size per bee</b> |              |             |              |              |
| (Intercept)                           | 1.14         | 0.62        | -0.09        | 2.36         |
| 5ppb                                  | -0.46        | 0.42        | -1.29        | 0.37         |
| 10ppb                                 | -0.31        | 0.57        | -1.44        | 0.82         |
| <b>bee size</b>                       | <b>0.38</b>  | <b>0.12</b> | <b>0.15</b>  | <b>0.61</b>  |
| bee size:5ppb                         | 0.01         | 0.08        | -0.15        | 0.16         |
| bee size:10ppb                        | -0.02        | 0.11        | -0.24        | 0.19         |
| <b>H) Worker survival</b>             |              |             |              |              |
| 5ppb                                  | -0.46        | 0.50        | -1.44        | 0.52         |
| 10ppb                                 | 0.13         | 0.45        | -0.75        | 1.01         |
| <b>250ppb</b>                         | <b>2.07</b>  | <b>0.37</b> | <b>1.35</b>  | <b>2.79</b>  |
